# Supplementary material for: Synthesis of activated carbon-surrounded and carbon-doped anatase TiO2 nanocomposites
Source: Royal Society of Chemistry journal article supplement (doi:10.1039/c0jm00286k), 2010-01-01
Supplement: c0jm00286k.pdf [file c0jm00286k.pdf]

**Supporting Information for**  
**Synthesis of Activated Carbon-Surrounded and Carbon-Doped**  
**Anatase TiO<sub>2</sub> Nanocomposites**

*Ying-Feng Lee<sup>1</sup>, Kuo-Hsin Chang<sup>1,2</sup>, Chi-Chang Hu<sup>1,\*</sup>, and Kuo-Min Lin<sup>1</sup>*

1. Laboratory of Electrochemistry and Advanced Materials, Department of Chemical Engineering,  
National Tsing-Hua University, 101, Section 2, Kuang-Fu Road, Hsin-Chu, 30013, TAIWAN
2. Department of Chemical Engineering, National Chung Cheng University, 168 University Rd.,  
Min-Hsiung, Chia-Yi 621, TAIWAN

\* To whom correspondence should be addressed. E-mail: [cchu@che.nthu.edu.tw](mailto:cchu@che.nthu.edu.tw)

The supporting data include Table S1 and Fig. S1 – S5.

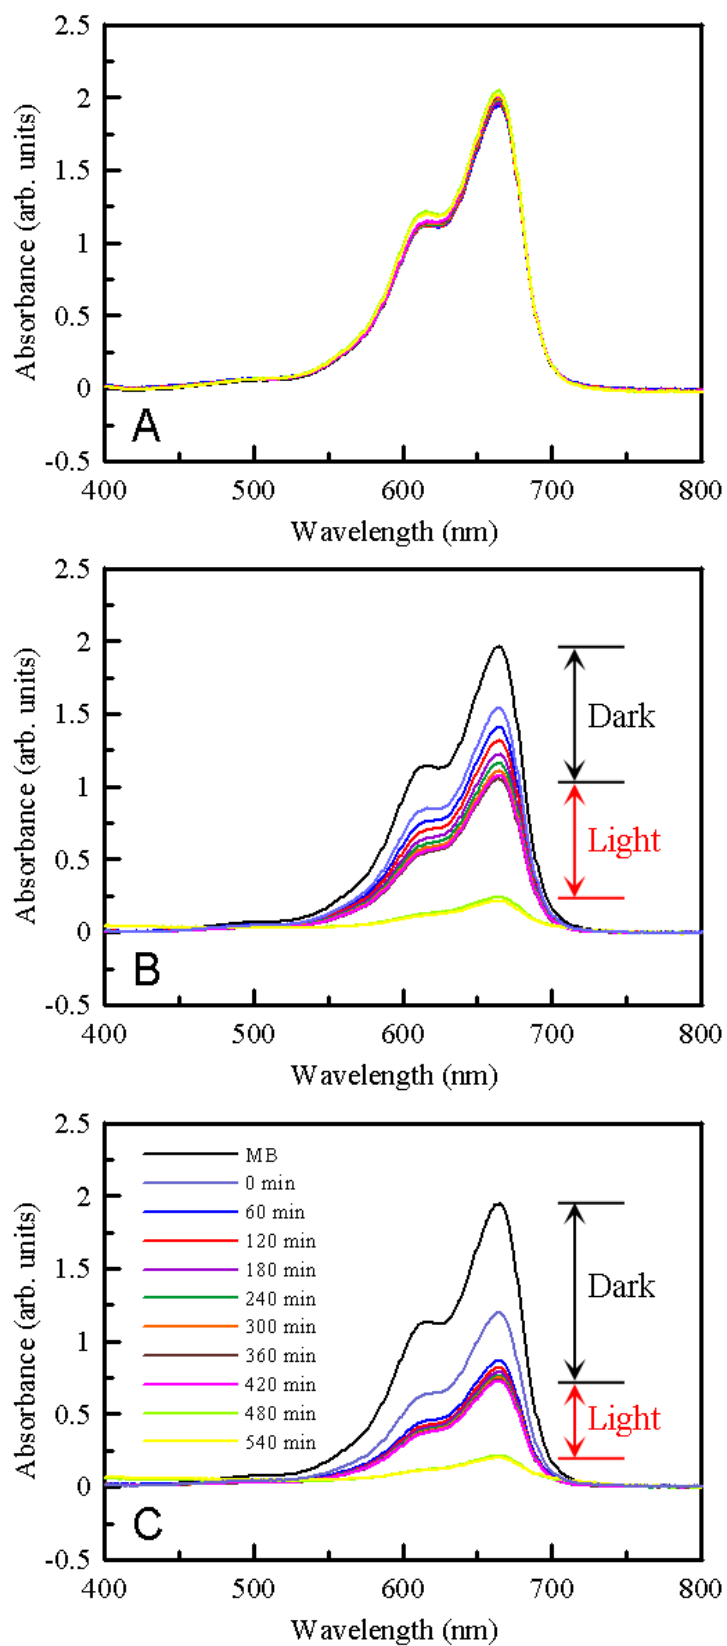

**Fig. S1** UV-VIS spectra for photocatalytic degradation of MB by (A) pure A-TiO<sub>2</sub> (sample A), and A-TiO<sub>2-x</sub>C<sub>x</sub>-AC nanocomposites of (B) sample B and (C) sample C. Visible light was turned on at 420 min.

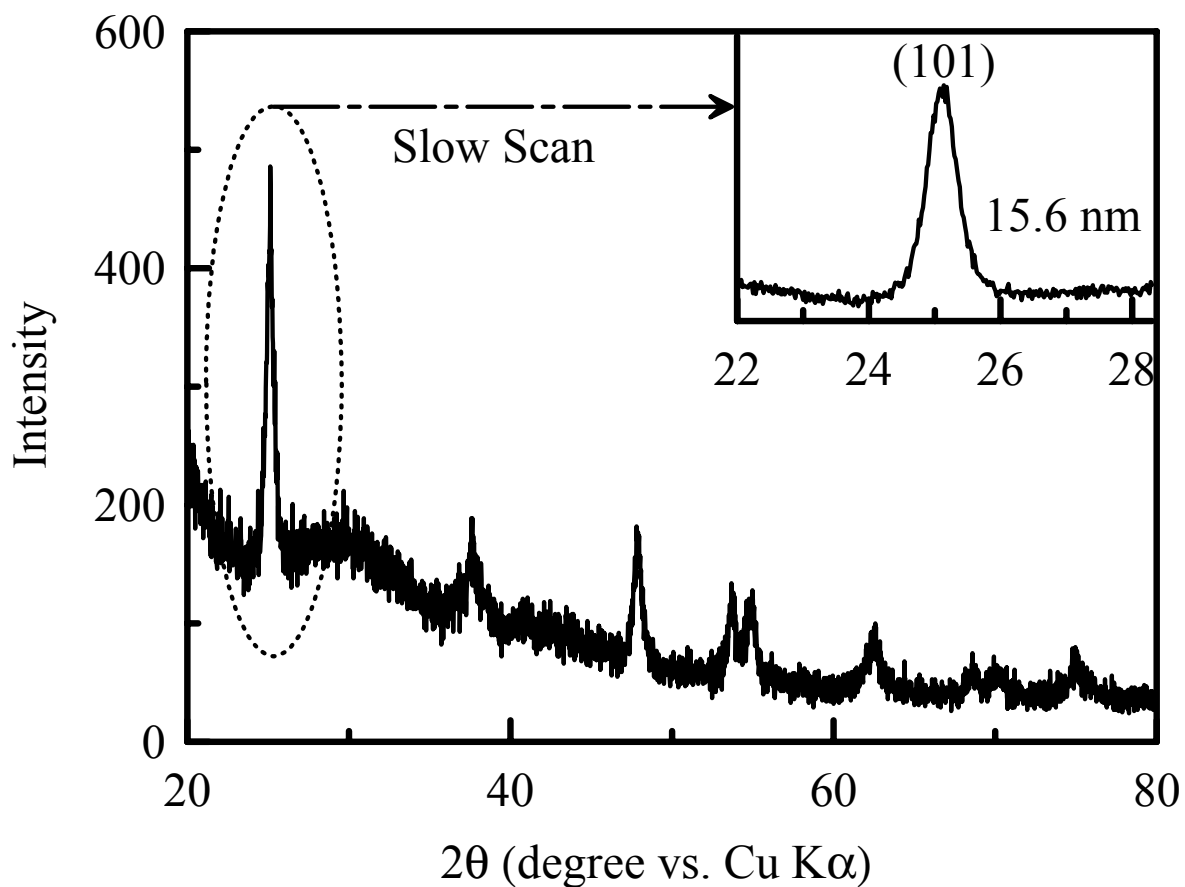

**Fig. S2** The XRD pattern of the control sample (i.e., A-TiO<sub>2</sub> powders prepared from TTIP without adding any self-assembled copolymer). The average crystal size, equal to ca. 15.6 nm, was calculated from (101) peak by the Debye–Scherrer equation.

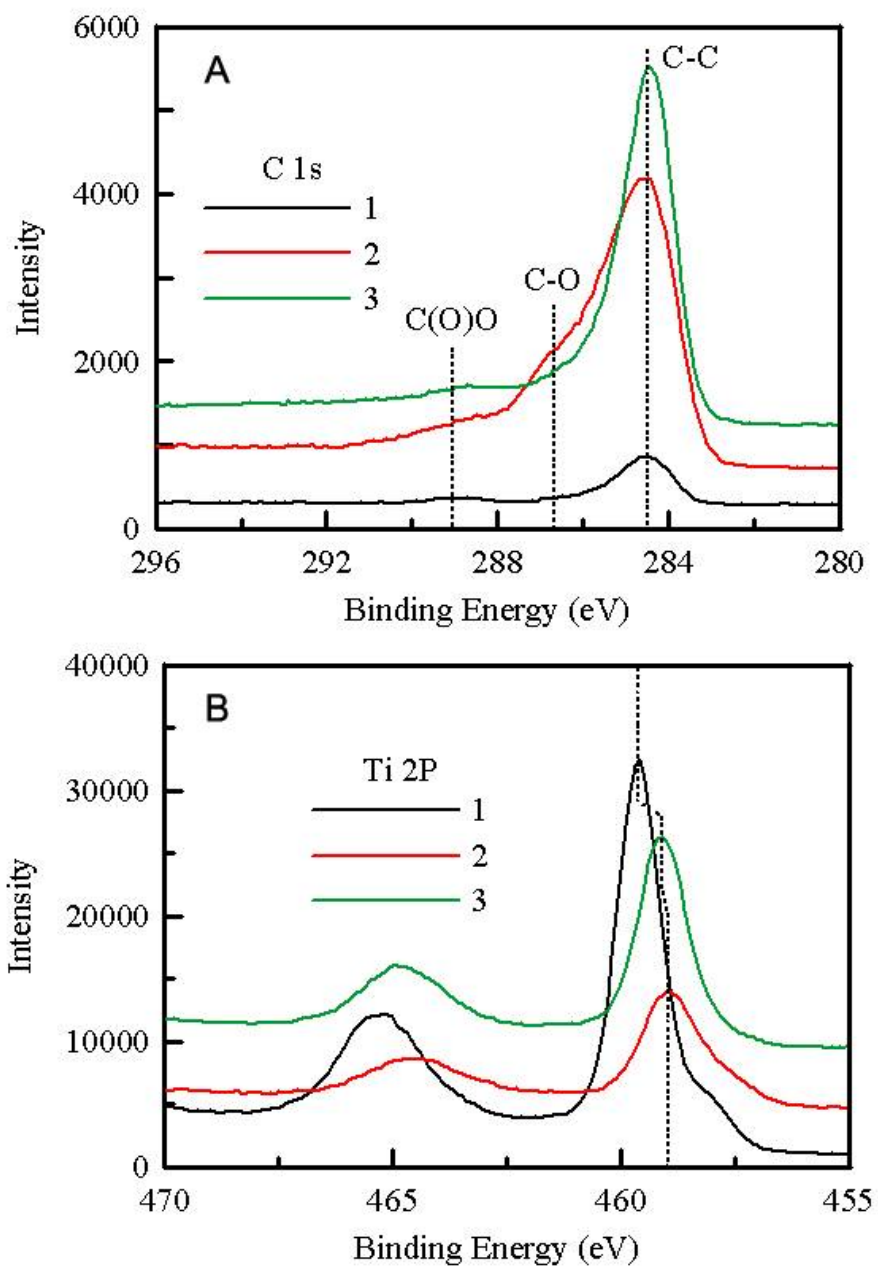

**Fig. S3** XPS core-level spectra of (A) C 1s and (B) Ti 2p for (1) sample A, (2) sample B, and (3) sample C.

**Table S1** The fitting results of C1s XPS spectra of samples B and C.

| Samples  | Carbon species<br>(relative atomic percentage %) |       |       |
|----------|--------------------------------------------------|-------|-------|
|          | C sp <sup>3</sup>                                | C-O   | C(O)O |
| Sample B | 69.15                                            | 24.60 | 6.25  |
| Sample C | 82.14                                            | 12.12 | 5.74  |

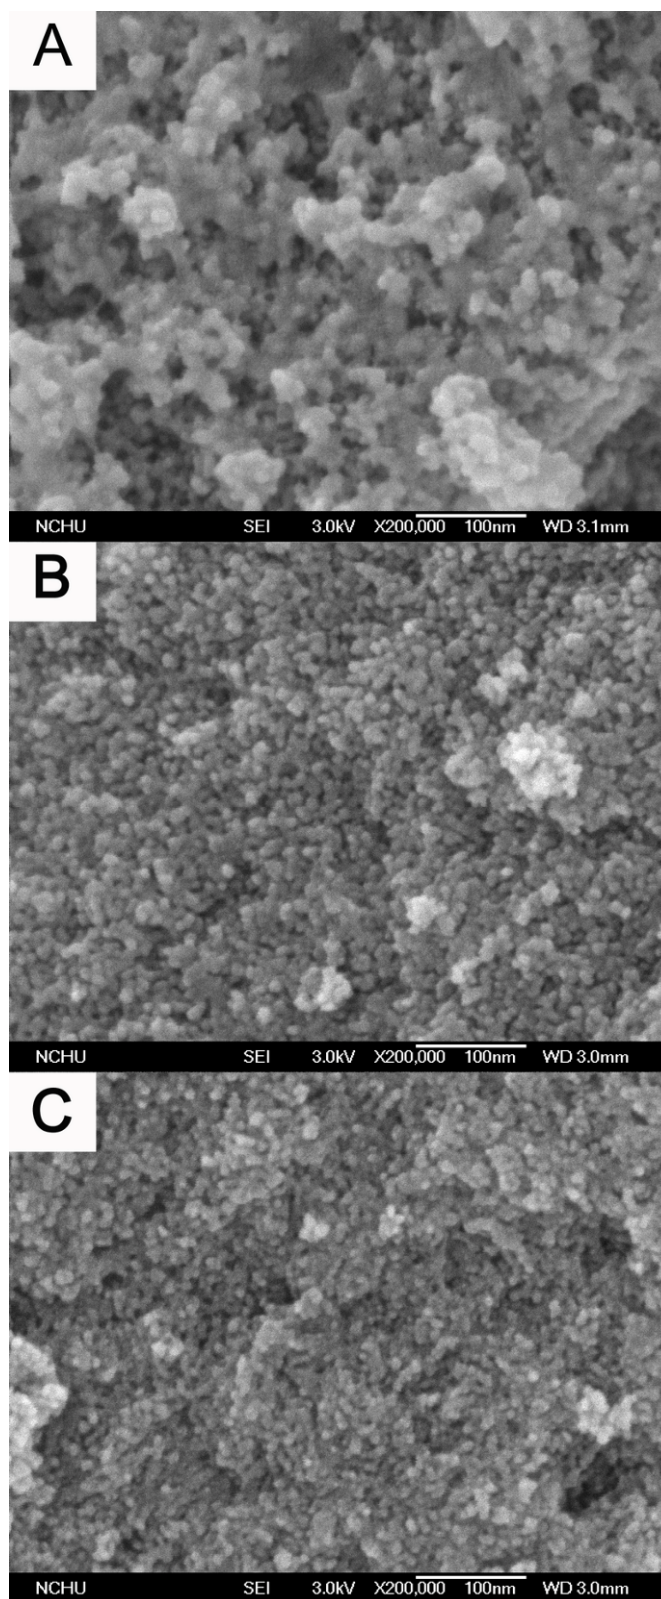

**Fig. S4** SEM images of (A) sample A ( $A\text{-TiO}_2$ ), and  $A\text{-TiO}_{2-x}\text{C}_x\text{-AC}$  nanocomposites of (B) sample B and (C) sample C.



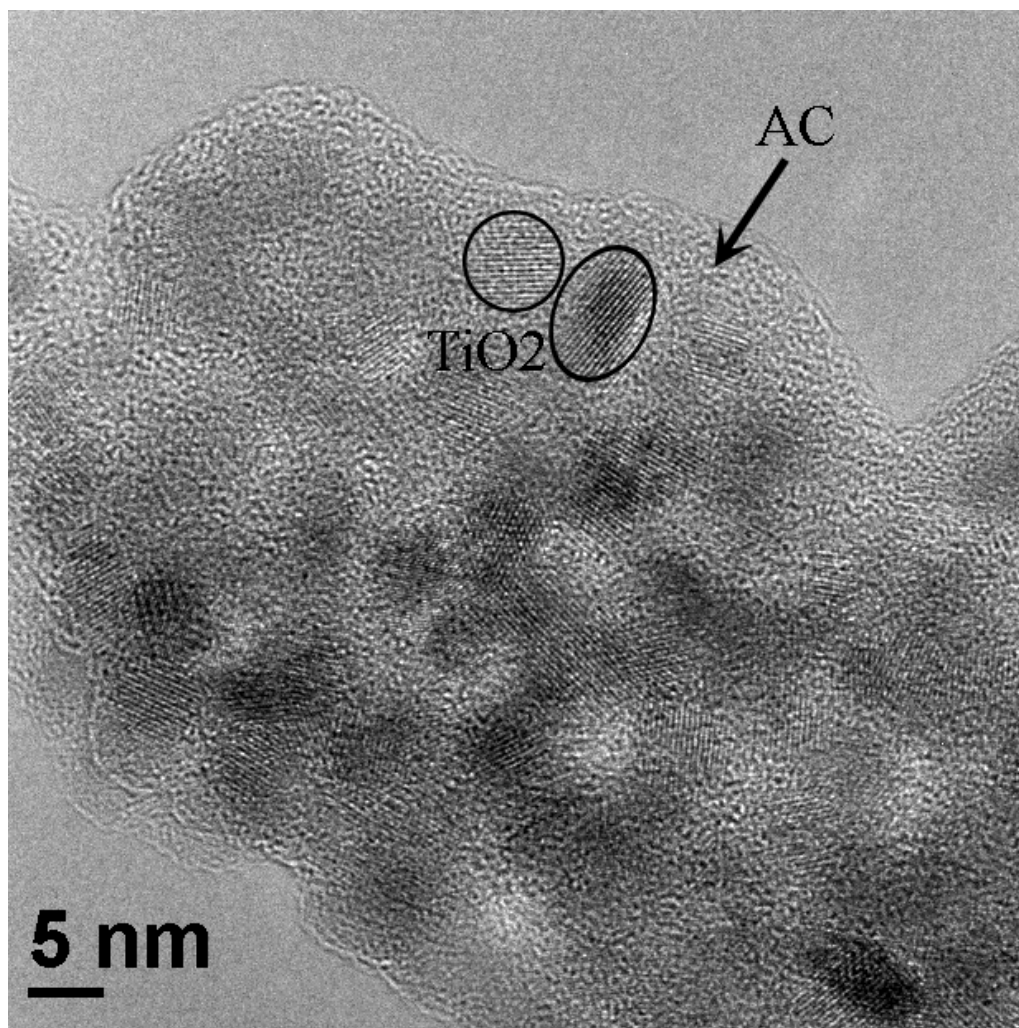

**Fig. S5** A HR-TEM image of an A-TiO<sub>2-x</sub>C<sub>x</sub>-AC nanocomposite prepared from the aged mixture with the P123/TTIP ratio equal to 0.035, calcinated at 450°C for 4 h under vacuum. This HR-TEM image clearly shows the thickness of AC layer is simply increased by raising the amount of copolymer in the precursor mixture.
